# Supplementary material for: Monotypic low-level HIV viremias during antiretroviral therapy are associated with disproportionate production of X4 virions and systemic immune activation
Source: PubMed Central journal article supplement — AIDS. 2018 Jul 2;32(11):1389–401. doi: 10.1097/QAD.0000000000001824 (PMC6039404; doi:10.1097/qad.0000000000001824), 2018-07-02
Supplement: aids-32-1389-s001.pdf [file aids-32-1389-s001.pdf]

Bull et al., Supplemental Figure 1

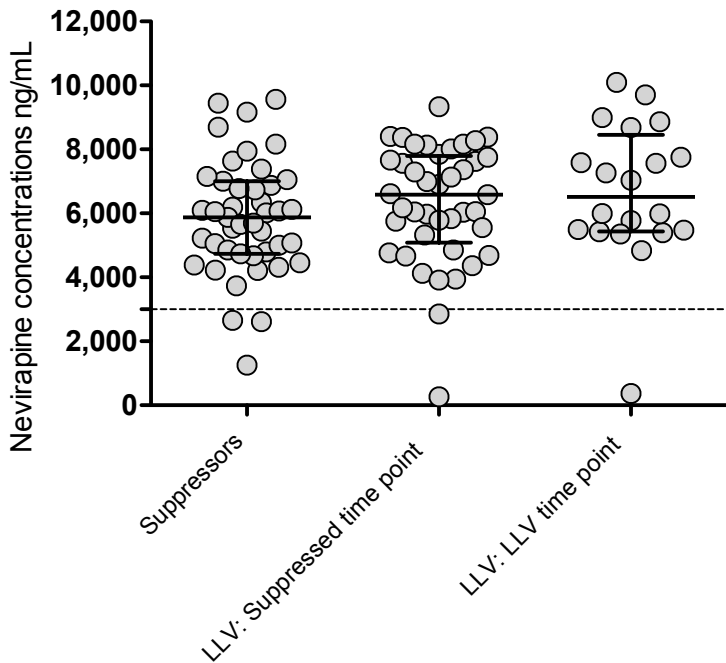

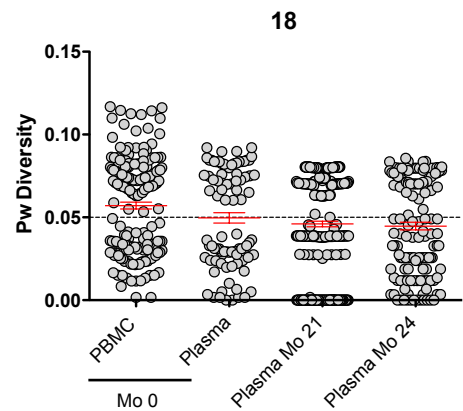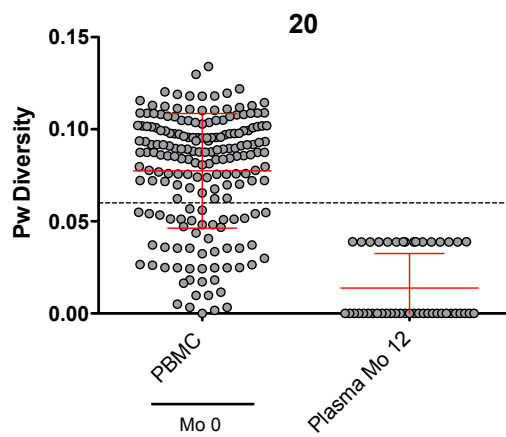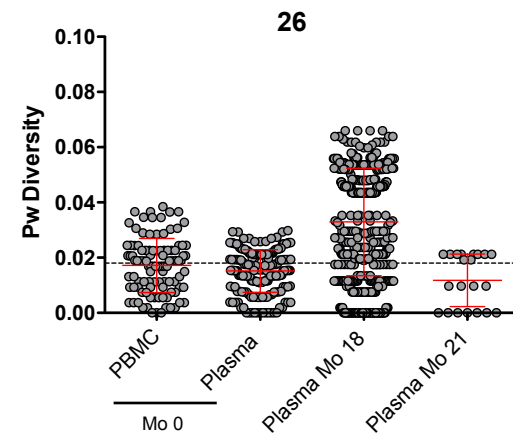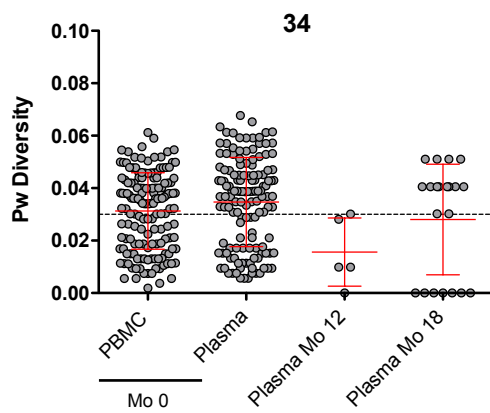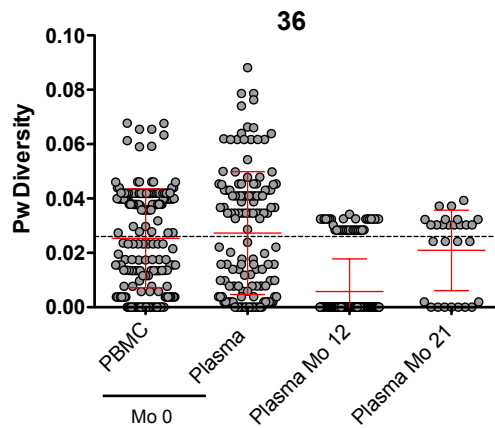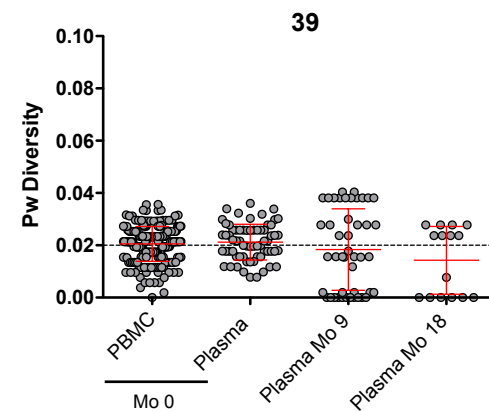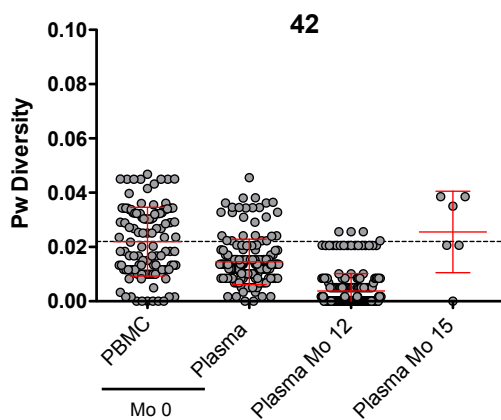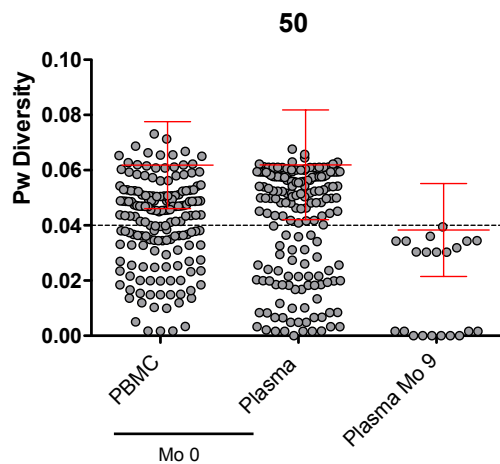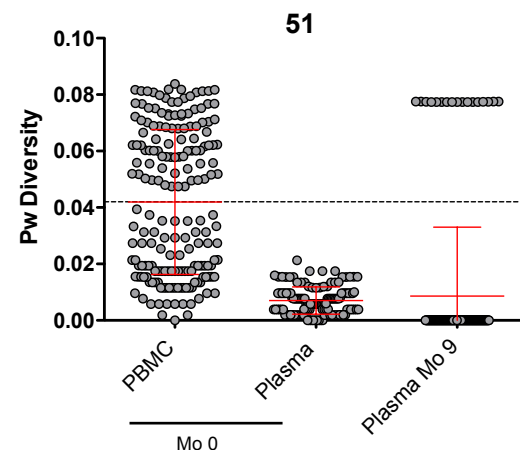

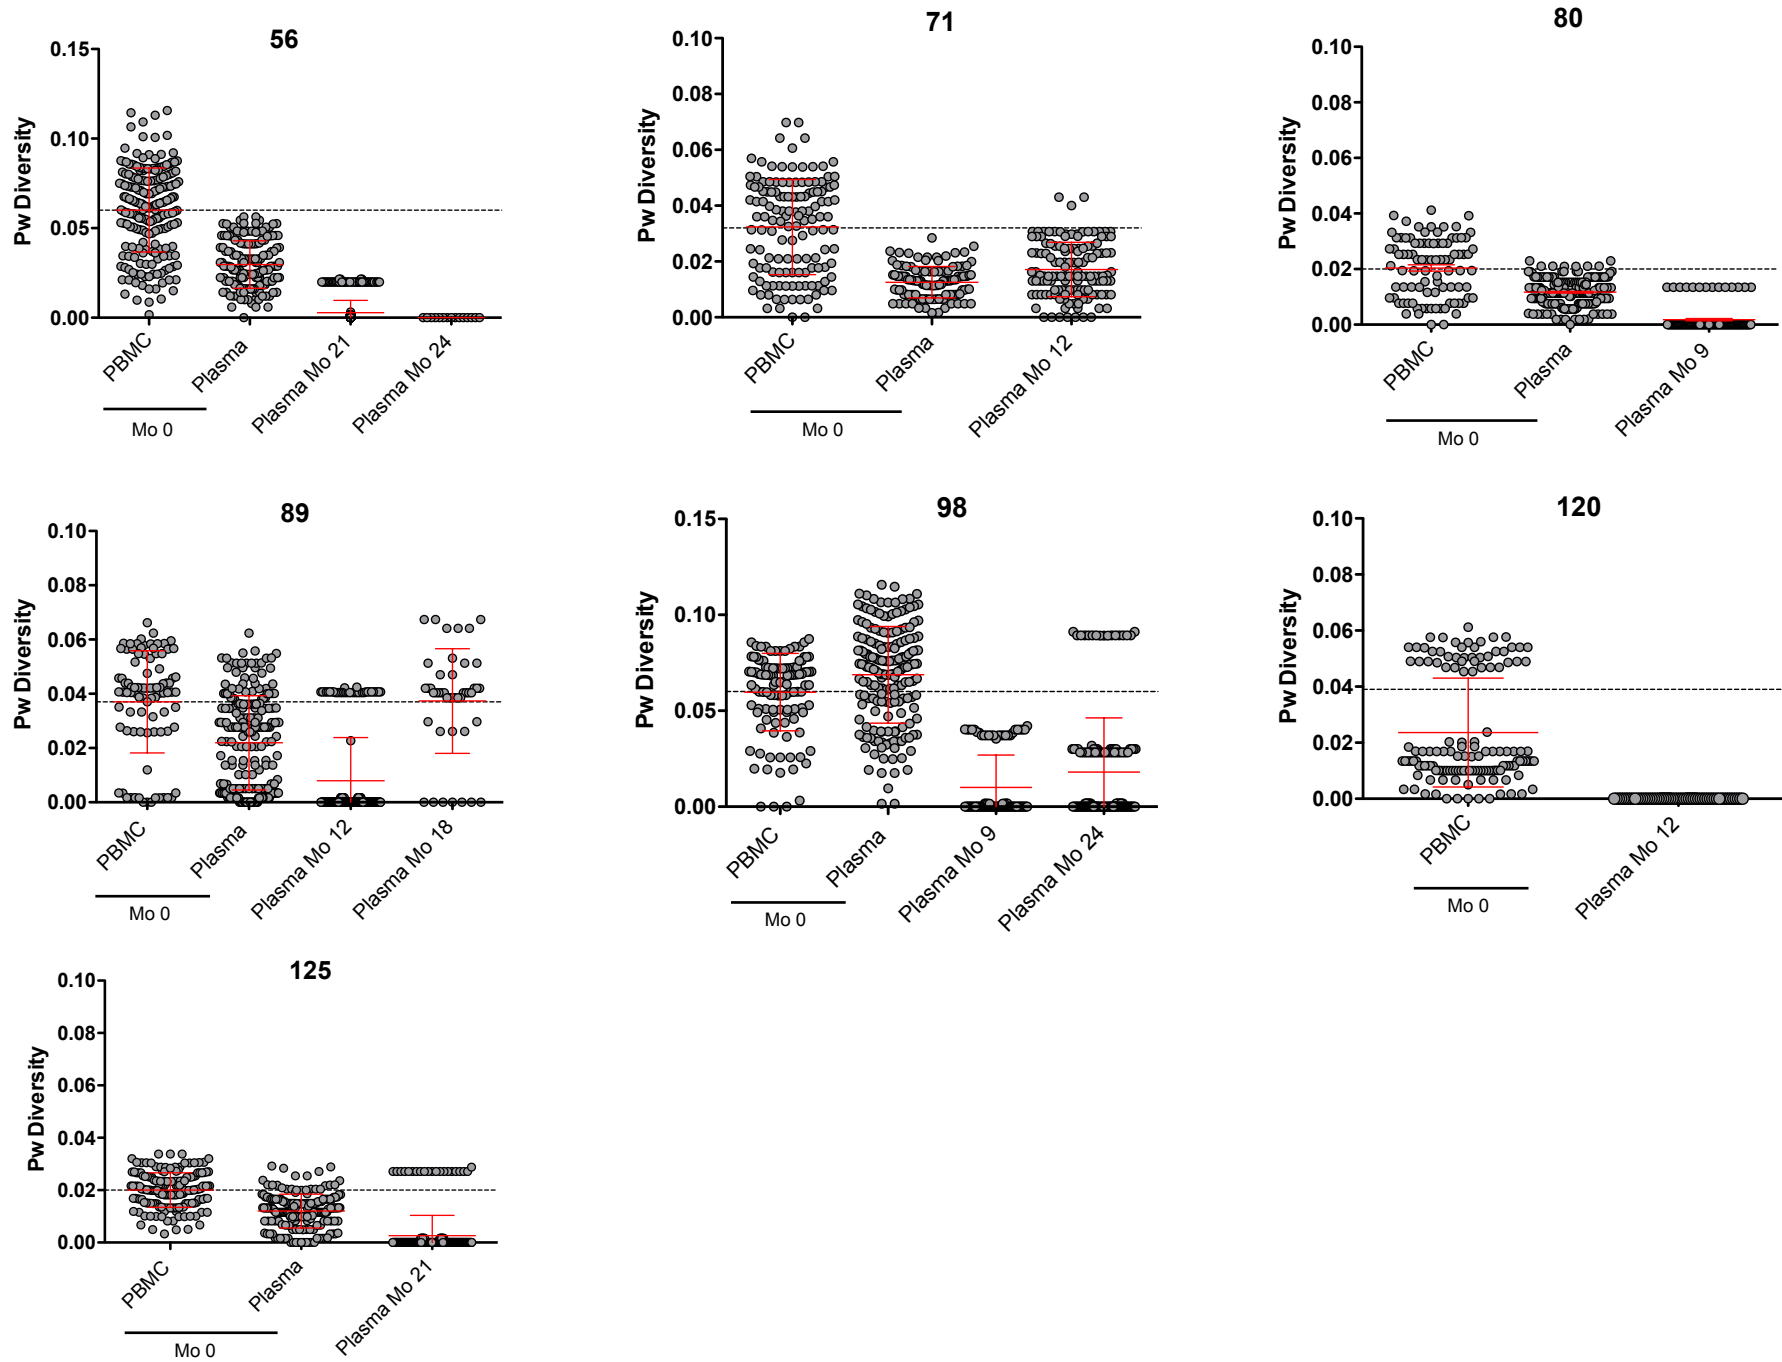

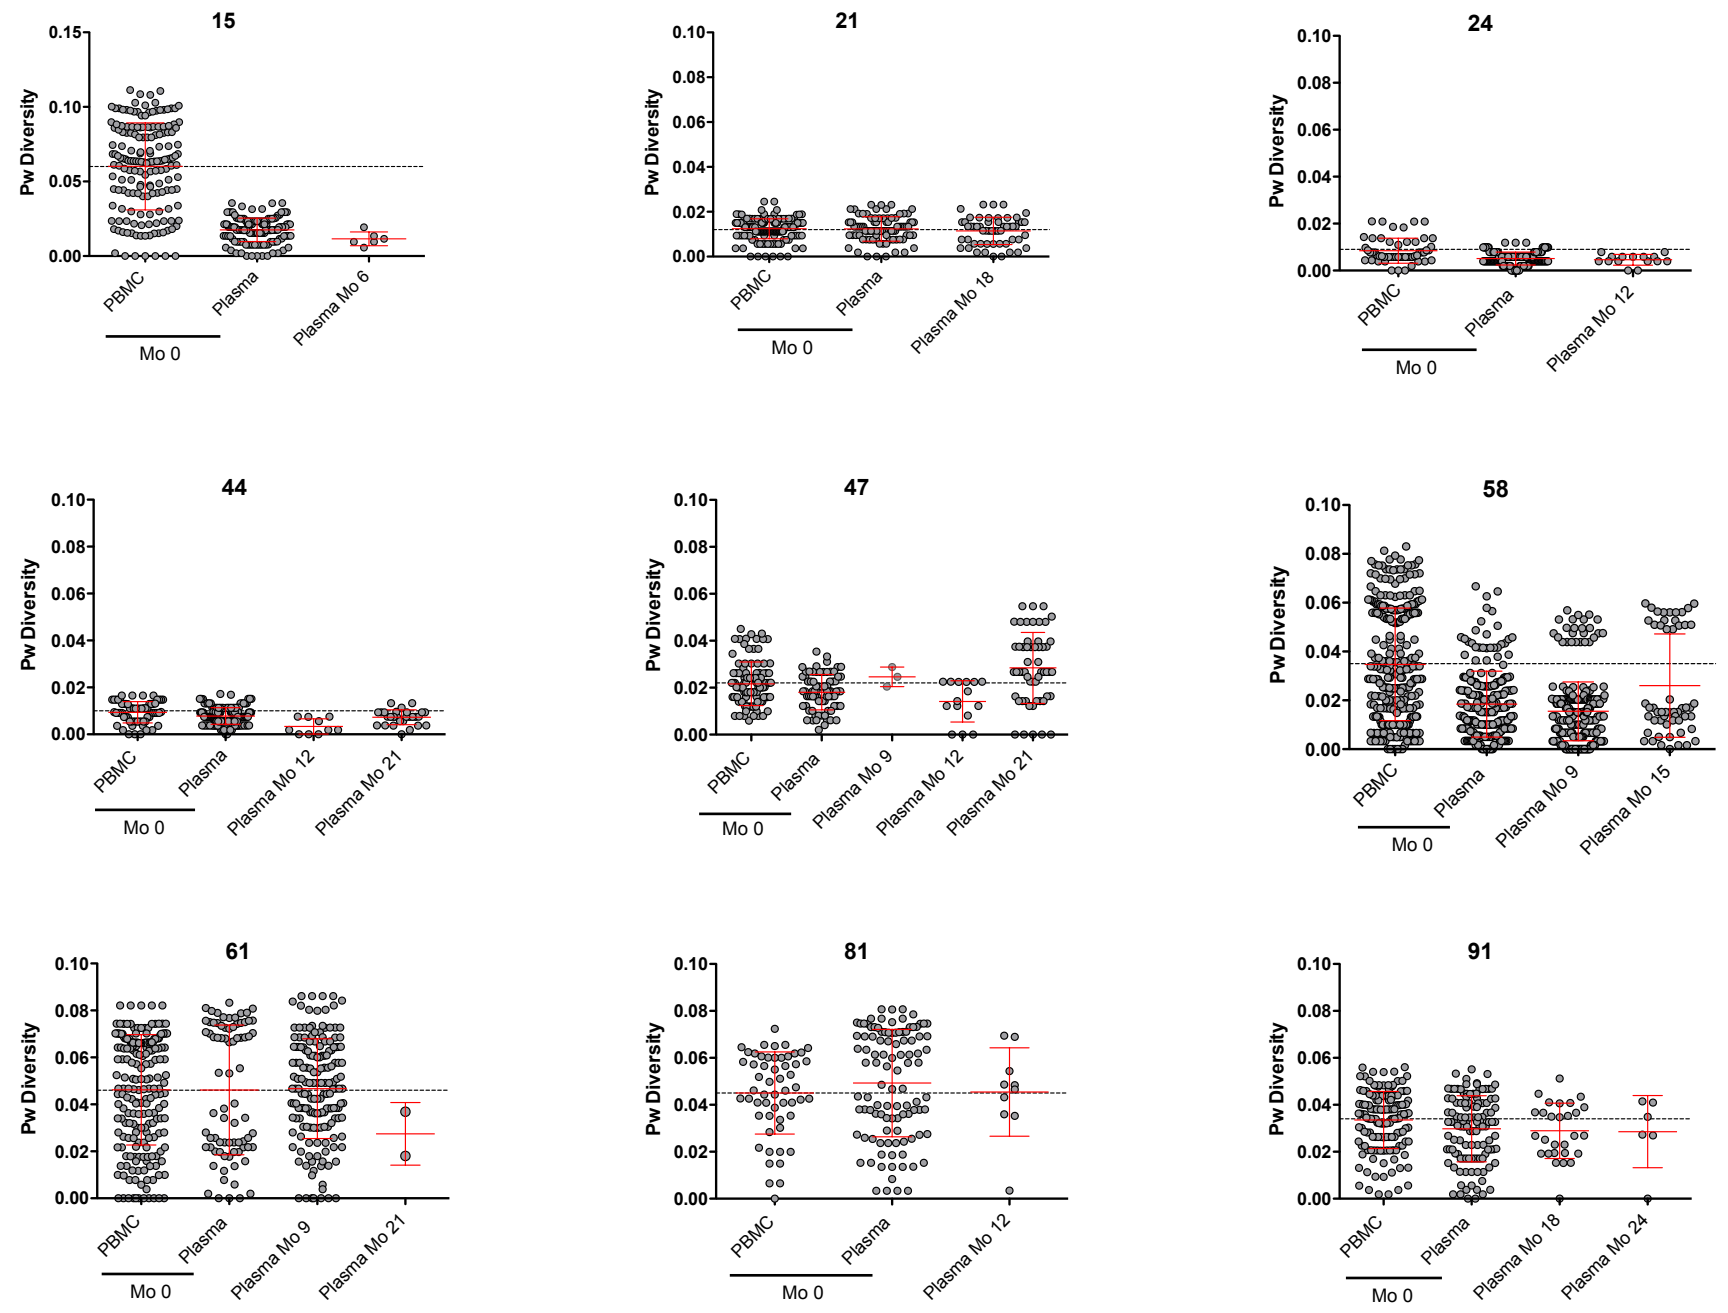

Bull et al. Supplemental Figure 2, Panel D

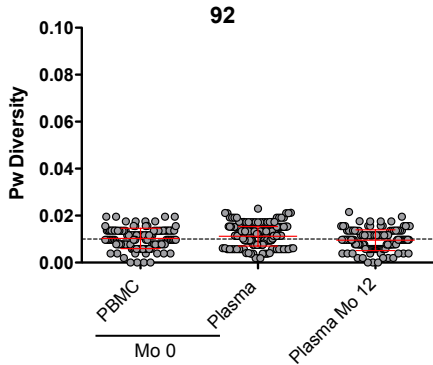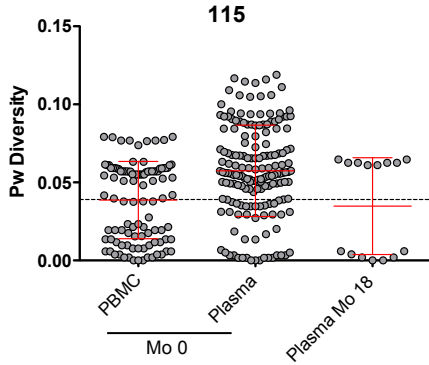

**Supplemental Figure 1:** Quantification of plasma nevirapine (**NVP**) concentrations in participants with and without LLV. NVP concentrations were compared in specimens within participants when ART-suppressed and at LLV, and across participants at time-points with and without LLV. The NVP concentrations were similar in participants with and without LLV detected during the study; and in the former, both at LLV time-points and time-points when their plasma HIV RNA was <30c/mL.

**Supplemental Figure 2:** Phylogenetic HIV pairwise *env* diversity from participants evaluated for low-level viremias (**LLV**) grouped by phylogenetic pattern into those with (A) monotypic pattern #1 and with (B) a diverse pattern #2. Single genome amplicons (**SGA**) were generated as described in methods and sequences aligned using the MUSCLE algorithm in Geneious (BioMatters, Newark, NJ) and employed PhyML in DIVEIN [18] to generate maximum likelihood trees and pair-wise diversity (pwDiversity).
